# Supplementary material
Source: publisher figshare collection journal article supplement (https://tandf.figshare.com/ndownloader/files/22664726)
Supplement: Supplementary file 1 [file 22664726]

Supplementary data:

**Investigation of Stability of Selective Androgen Receptor Modulators in Urine**

Emiliano Venturaa*, Anna Gadaja*, Tom Buckleyb and Mark H. Mooneya

a Institute for Global Food Security, School of Biological Sciences, Queen’s University Belfast, BT9 5DL, United Kingdom

b Irish Diagnostic Laboratory Services Ltd., Johnstown, Co. Kildare, W91 RH93, Ireland

*Corresponding authors: eventura01@qub.ac.uk, emiliano.ventura@outlook.it (E. Ventura), agadaj@gmail.com (A. Gadaj).

**Figure S1.** Stability of emerging SARMs in stock solutions. Mean response (and standard deviations, shown by error bars, *n*=5). Control samples expressed as 100%. ----- response limits (±10%).


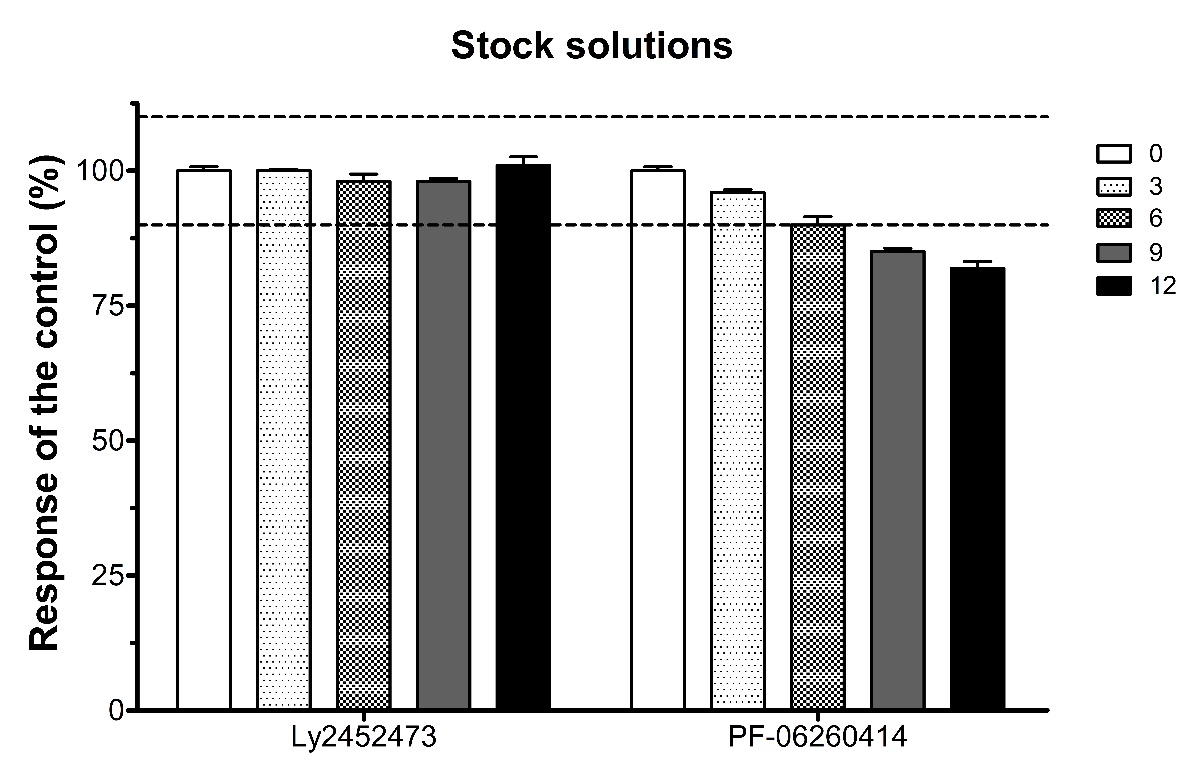


**Figure S2.** Stability of Ly2452473 and PF-06260414 in stock solutions. Mean response (and standard deviations, shown by error bars, *n*=3). Control samples expressed as 100%. ----- response limits (±10%).

**Figure S3.** Stability of emerging SARMs in working stock solutions. Mean response (and standard deviations, shown by error bars, *n*=3). Control samples expressed as 100%. ----- response limits (±10%).

**(a)**

**(b)**

**(c)**

**Figure S4.** Stability of selected SARMs in urine under frozen storage (-20 °C). Mean recovery (and standard deviations, shown by error bars, *n*=5) obtained from fortified blank (a) equine, (b) canine and (c) human urine. Where *p* <0.05 (*), <0.01 (**) and <0.001 (***), and ----- response limits (±20%).

**(a)**

**(b)**

**(c)**

**Figure S5.** Stability of selected SARMs in urine under frozen storage (-80 °C). Mean recovery (and standard deviations, shown by error bars, *n*=5) obtained from fortified blank (a) equine, (b) canine and (c) human urine. Where *p* <0.05 (*), <0.01 (**) and <0.001 (***), and ----- response limits (±20%).

**Figure S6.** Stability of selected SARMs in human urine under storage at 4 °C and room temperature (18 °C). Mean recovery (and standard deviations, shown by error bars, *n*=5) obtained from fortified blank human urine samples. Where *p* <0.05 (*), <0.01 (**) and <0.001 (***), and ----- response limits (±20%).

**(a)**

**(b)**

**(c)**

**Figure S7.** Stability of emerging SARMs in urine under freeze-thaw cycles. Mean recovery (and standard deviations, shown by error bars, *n*=5) obtained from fortified blank (a) equine, (b) canine and (c) human urine. Where p <0.05 (*), <0.01 (**) and <0.001 (***), and ----- response limits (±20%).

**(a)**

**(b)**

**(c)**

**Figure S8.** Stability of emerging SARMs in sample extracts - final injection solvent. Mean response (and standard deviations, shown by error bars, *n*=5) obtained from blank (a) equine, (b) canine and (c) human urine samples spiked post extraction. Control samples expressed as 100%. Where p <0.05 (*), <0.01 (**) and <0.001 (***), and ----- relative response limits (±20%).
